# Supplementary material for: Molecular evolution and expression divergence of the Populus euphratica Hsf genes provide insight into the stress acclimation of desert poplar
Source: PubMed Central journal article supplement (PMC4948027; doi:10.1038/srep30050), 2016-07-18
Supplement: srep30050-s1.pdf [file srep30050-s1.pdf]

## Supplementary Information

# Molecular evolution and expression divergence of the *Populus euphratica* Hsf genes provide insight into the stress acclimation of desert poplar

Jin Zhang<sup>1,2,+,\*</sup>, Huixia Jia<sup>1,2,+</sup>, Jianbo Li<sup>1</sup>, Yu Li<sup>1</sup>, Mengzhu Lu<sup>1,2</sup>, and Jianjun Hu<sup>1,2,\*</sup>

<sup>1</sup> State Key Laboratory of Tree Genetics and Breeding, Key Laboratory of Tree Breeding and Cultivation of the State Forestry Administration, Research Institute of Forestry, Chinese Academy of Forestry, Beijing 100091, China

<sup>2</sup> Co-Innovation Center for Sustainable Forestry in Southern China, Nanjing Forestry University, Nanjing 210037, China

\* Correspondence and requests for materials should be addressed to J.Z. (email: [zhang007jin@163.com](mailto:zhang007jin@163.com)) and J.H. (email: [hujj@caf.ac.cn](mailto:hujj@caf.ac.cn)).

+ These authors contributed equally to this work.

Fig. S1

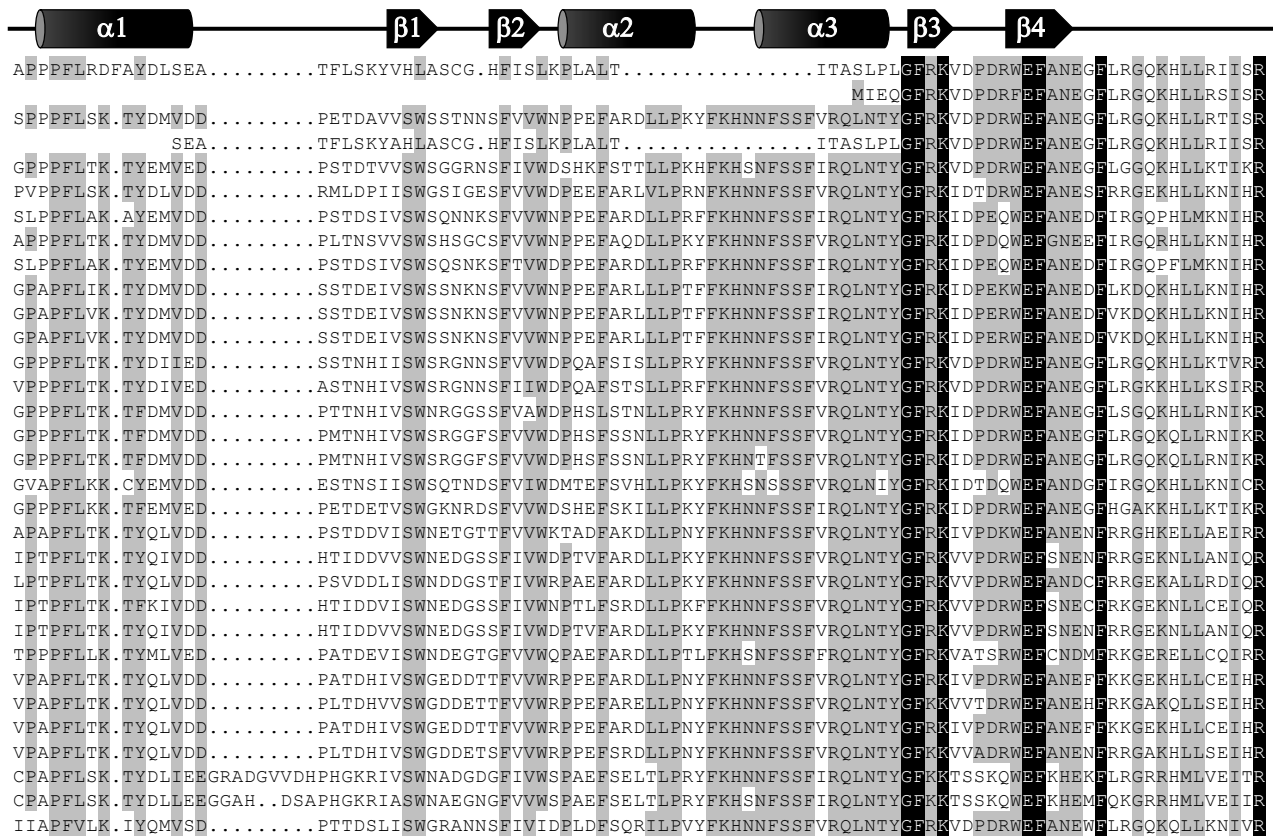

Fig. S1 Secondary structure of DBD region of *PeuhSf* family. Three  $\alpha$ - helices and four  $\beta$ - sheets were presented in the region.

**Fig. S2**

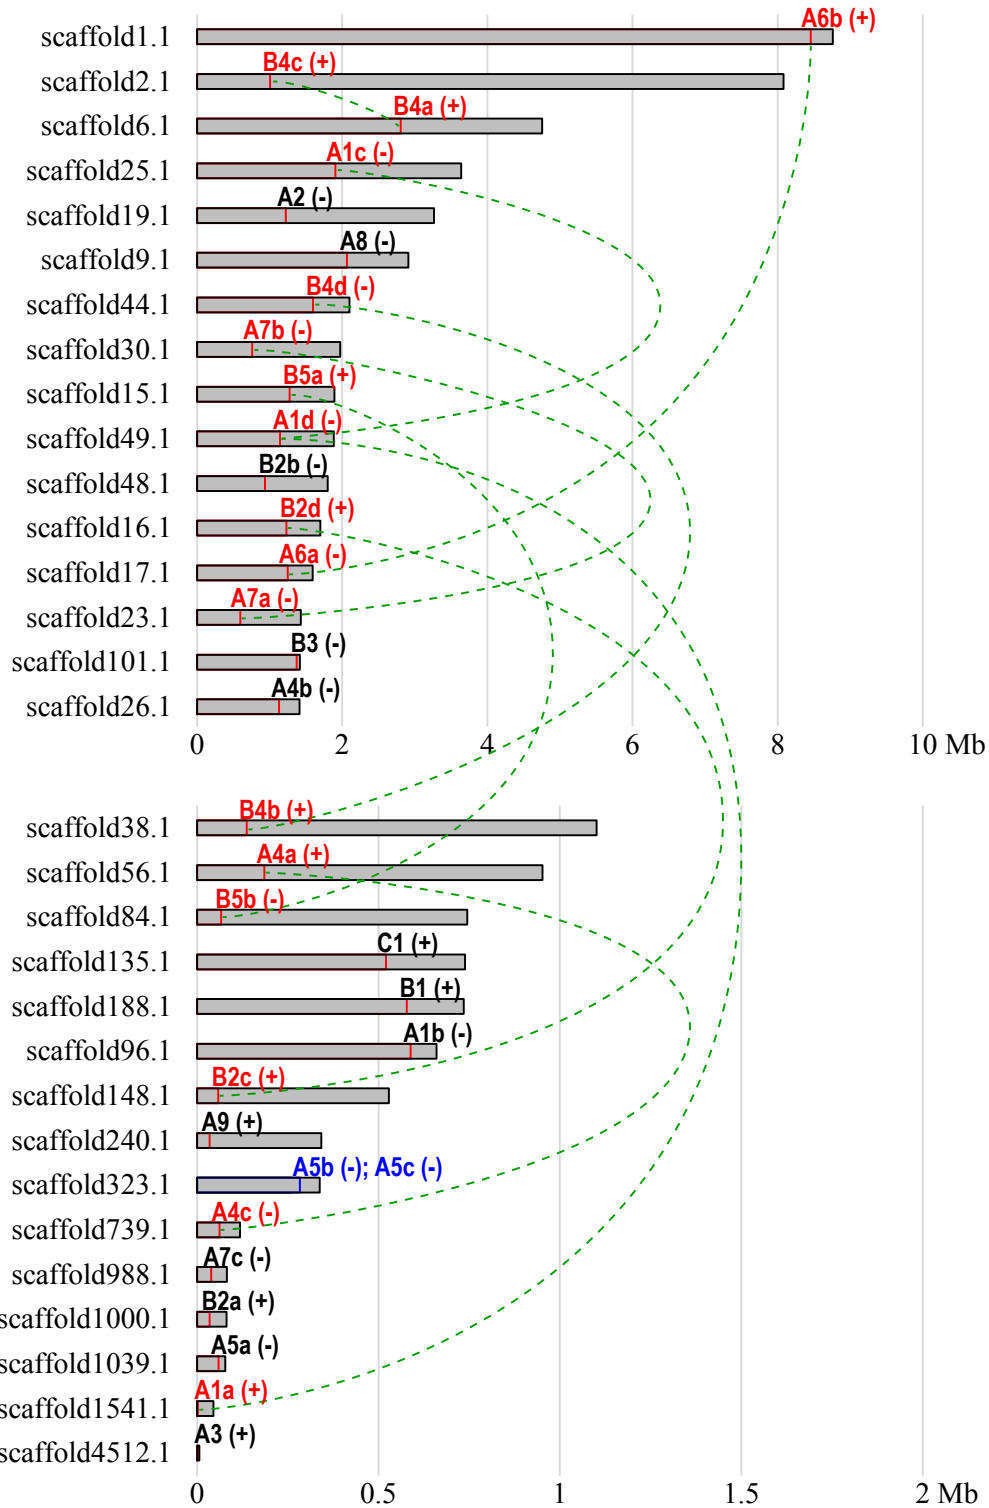

**Fig. S2** Chromosomal locations of *PeuHsf* genes.

Total of 32 *PeuHsfs* are mapped onto 31 scaffolds. Red letters indicate duplicated genes generated by whole genome duplication (WGD) events, blue letters indicate tandem duplicated genes. Green dash lines connect duplicated *PeuHsfs* which generated by WGD events.

**Fig. S3**

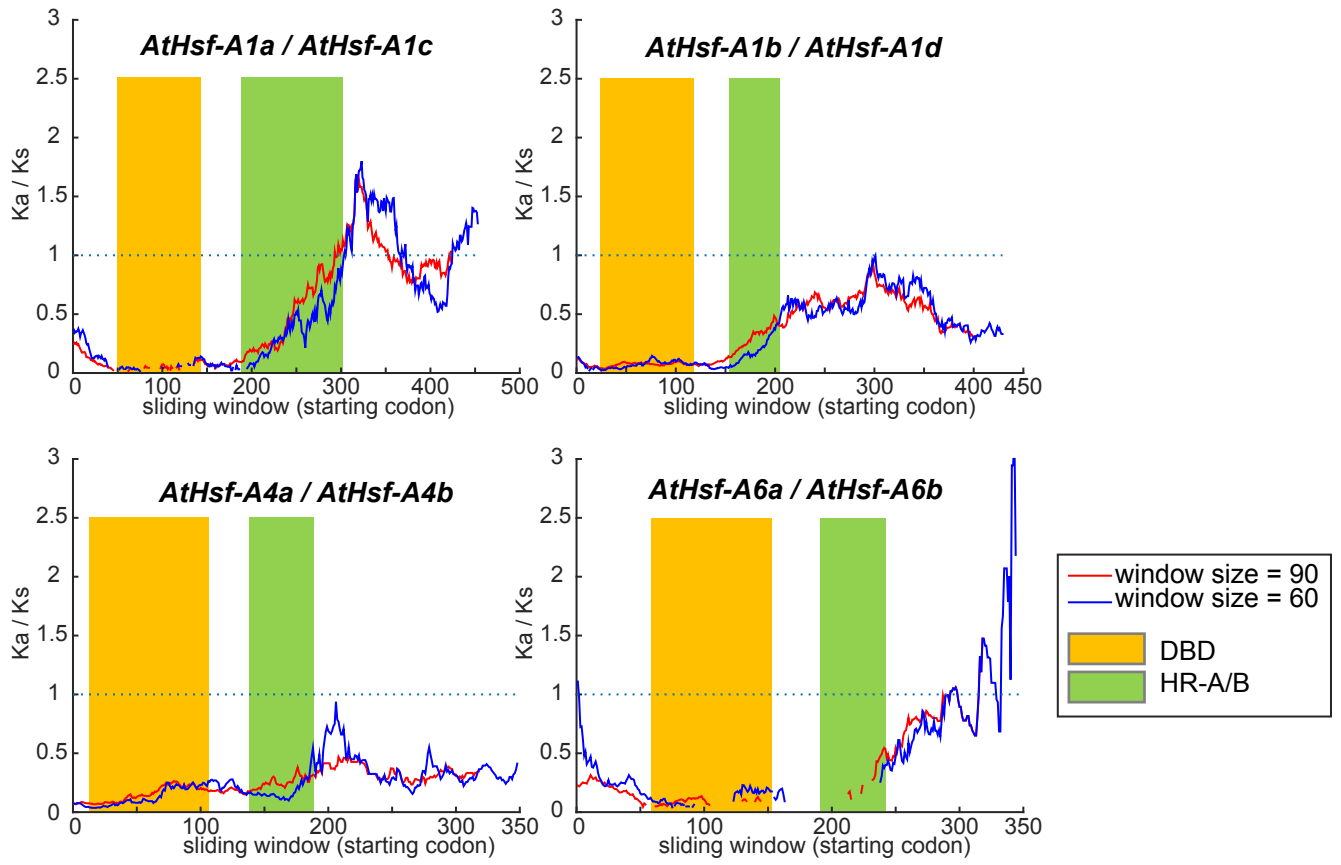

**Fig. S3** Sliding window plots of representative duplicated *Hsf* genes in *A. thaliana*.

**Fig. S4**

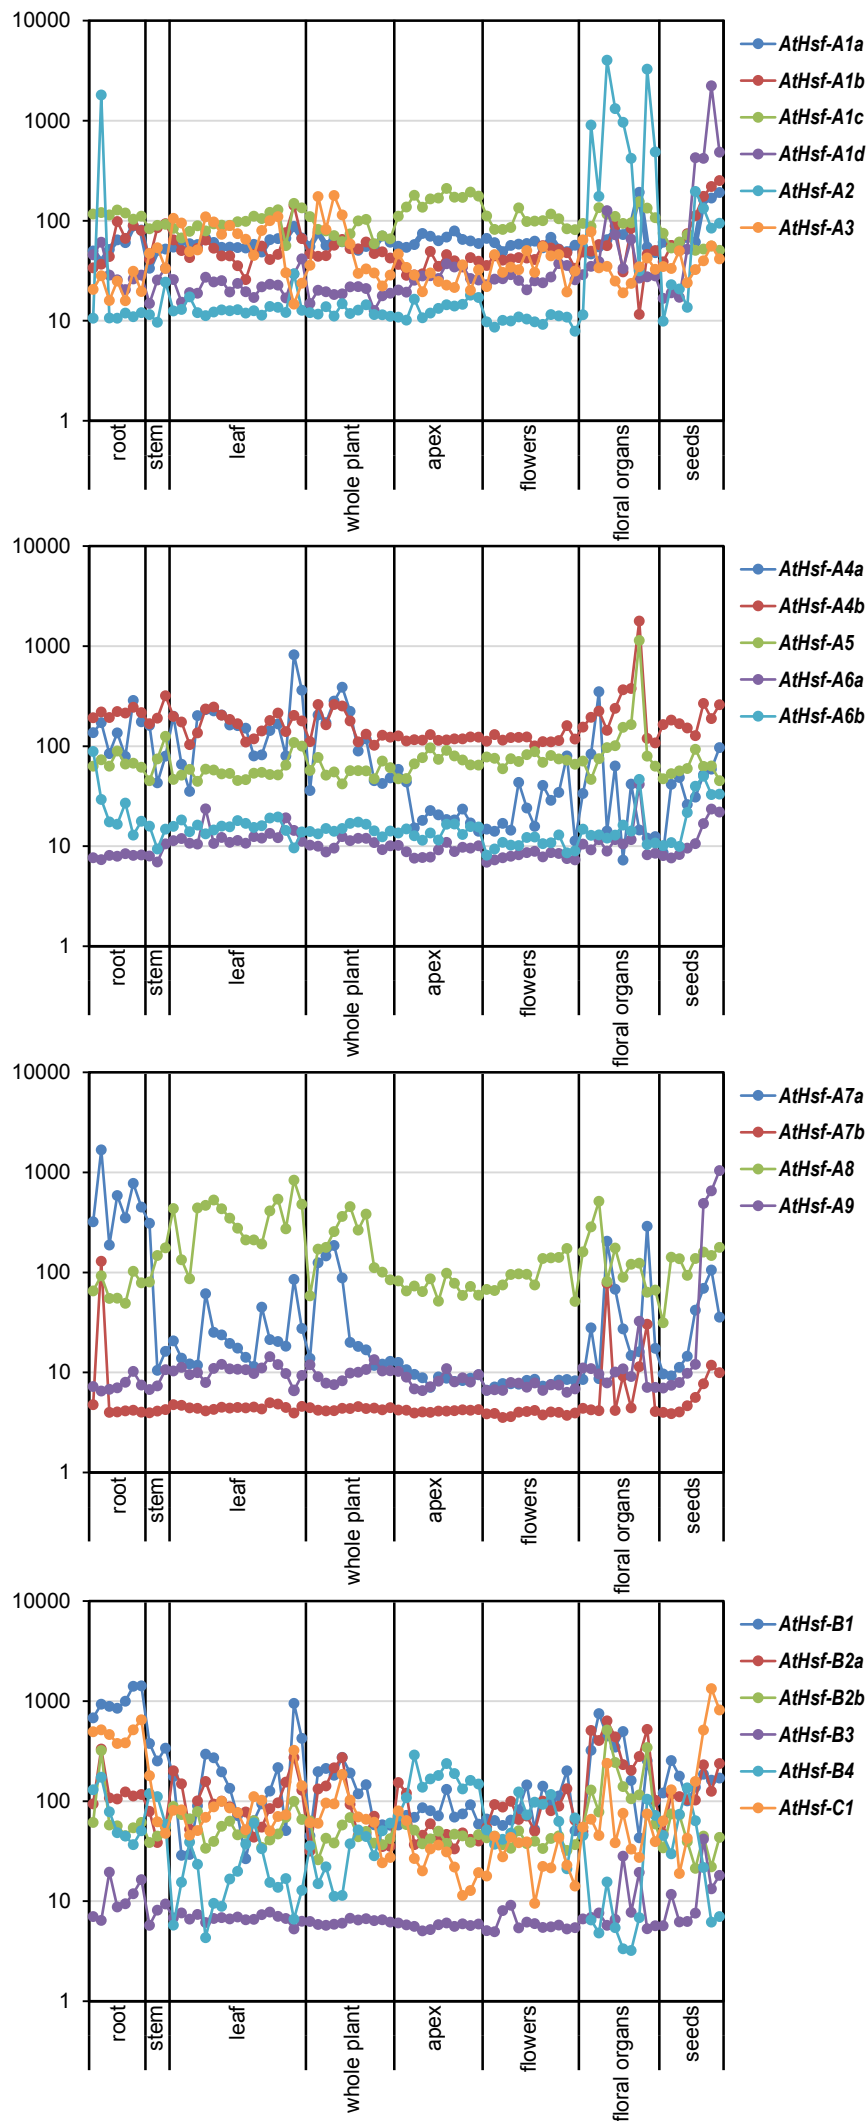

**Fig. S4** Expression patterns of *Arabidopsis* Hsf genes across various tissues.

**Fig. S5**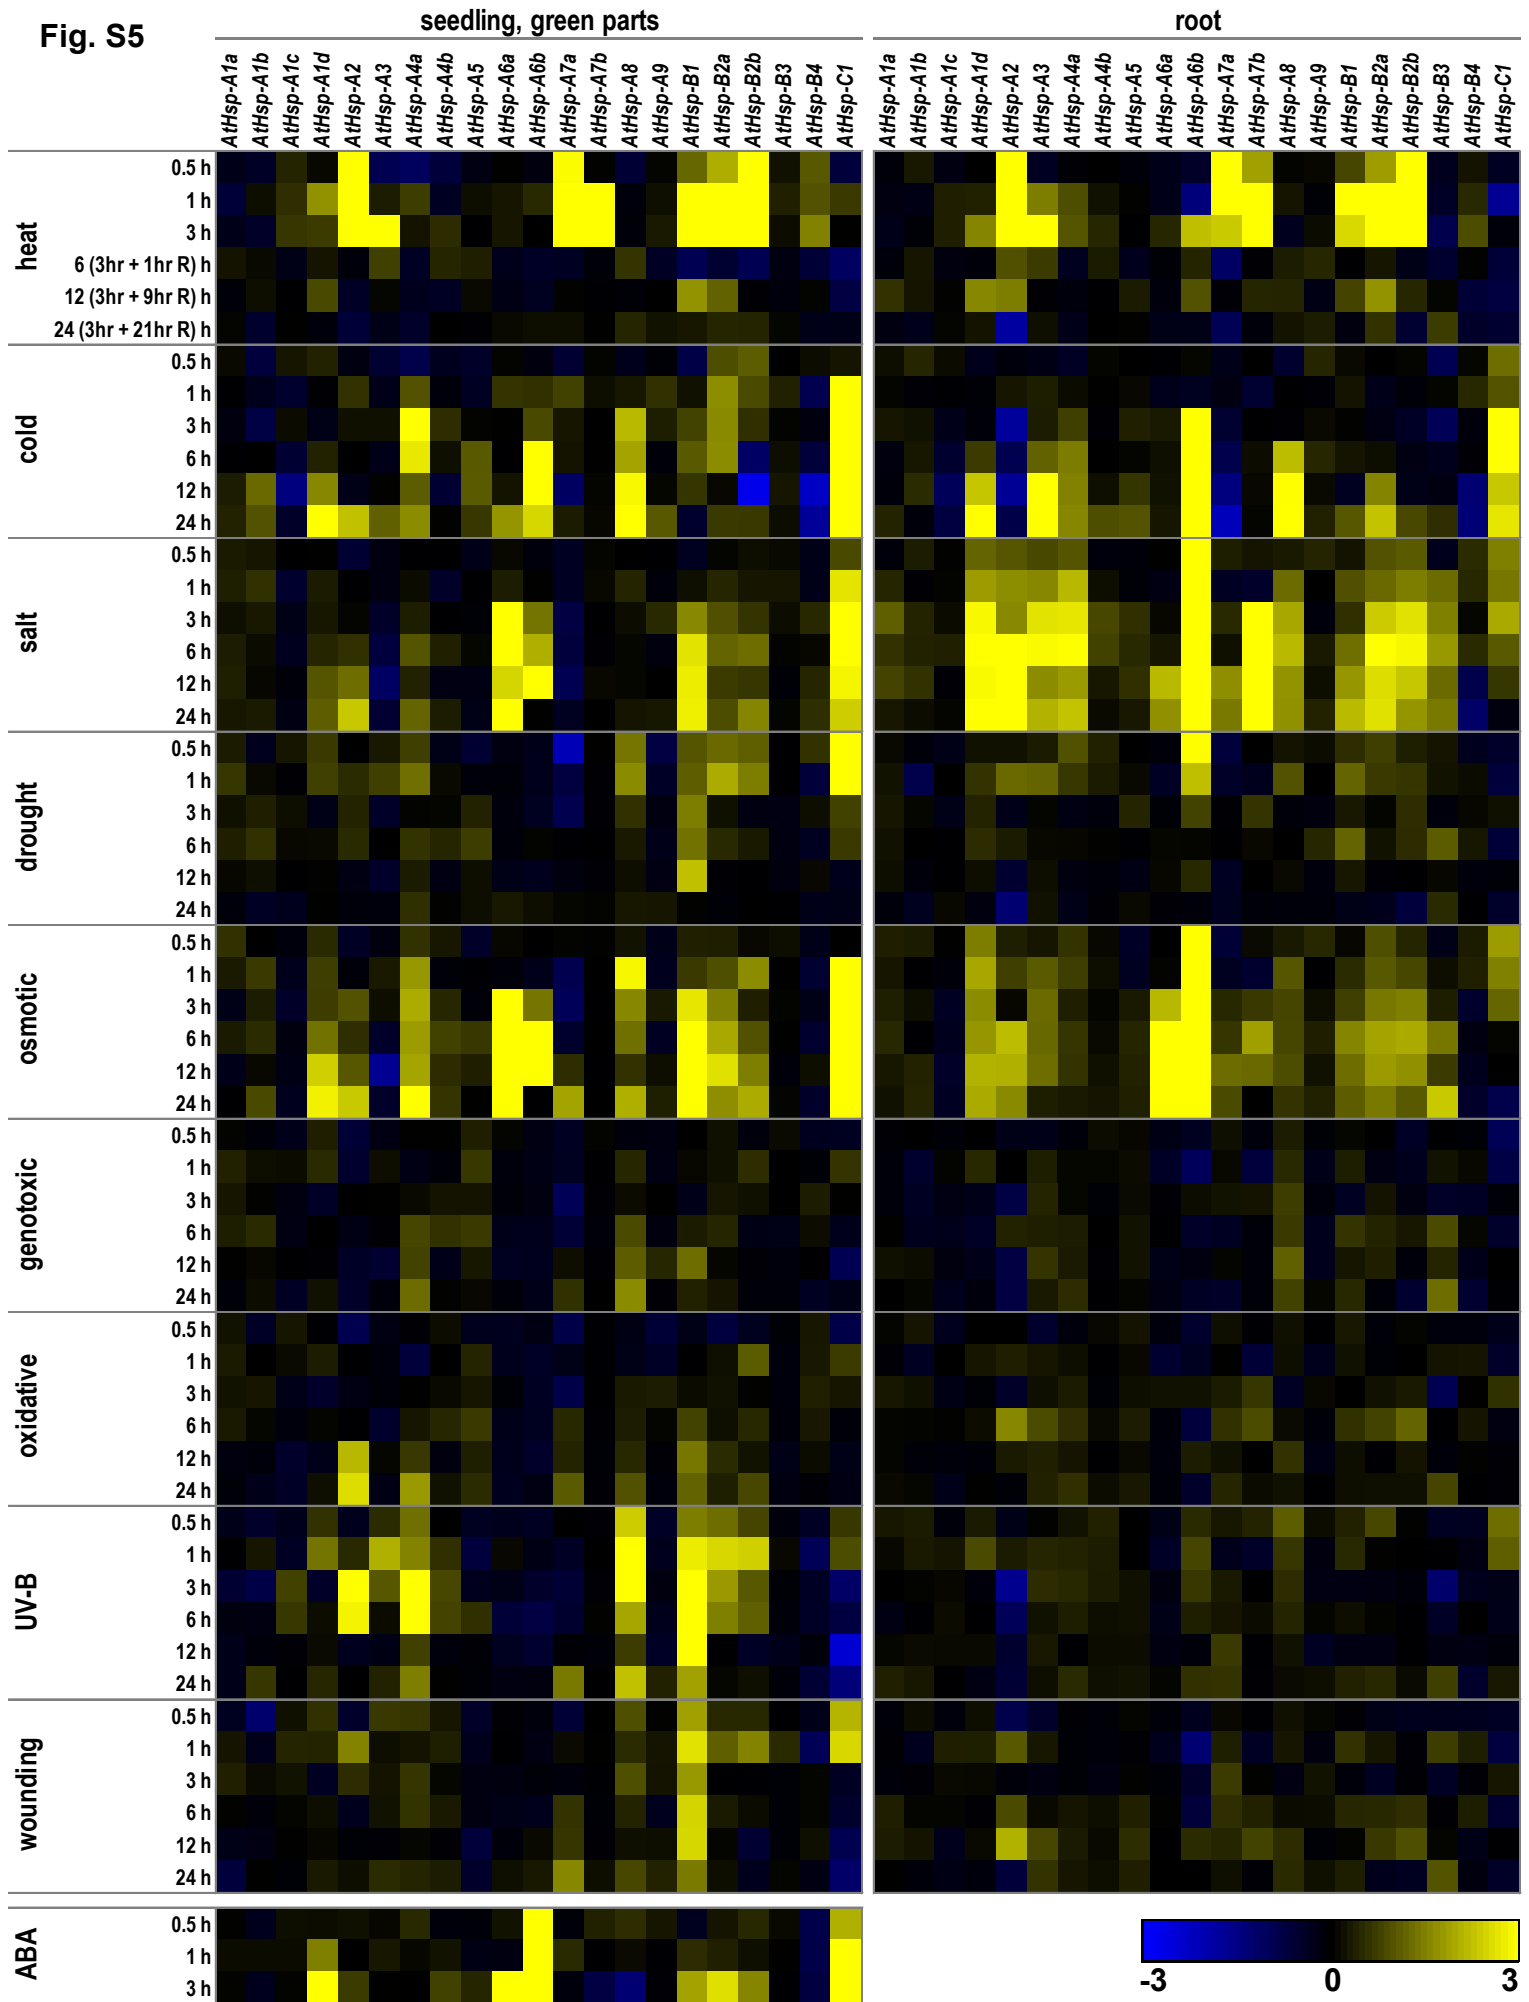**Fig. S5** Expression patterns of *Arabidopsis Hsf* genes across various abiotic stresses.

**Table S1. Comparison of Hsf members in *P. euphratica*, *P. trichocarpa*, and *A. thaliana*.**

| Hsfs   |        | <i>P. euphratica</i><br>(Peu) 32 | <i>P. trichocarpa</i><br>(Pt) 31 | <i>A. thaliana</i><br>(At) 21 |                 |             |
|--------|--------|----------------------------------|----------------------------------|-------------------------------|-----------------|-------------|
| Type A | A1     | A1a                              | CCG006597.1                      | Potri.003G095000.1            | At4g17750.1     |             |
|        |        | A1b                              | CCG033924.1                      | Potri.013G079800.1            | At5g16820.1     |             |
|        |        | A1c                              | CCG014424.1                      | Potri.001G138900.1            | At1g32330.1     |             |
|        |        | A1d                              | CCG024768.1                      | Potri.019G050400.1            | At3g02990.1     |             |
|        | A2     | A2                               | CCG009416.1                      | Potri.006G226800.1            | At2g26150.1     |             |
|        | A3     | A3                               | CCG023633.1                      | Potri.006G115700.1            | At5g03720.1     |             |
|        | A4     | A4a                              | CCG026694.1                      | Potri.011G071700.1            | At4g18880.1     |             |
|        |        | A4b                              | CCG015090.1                      | Potri.014G141400.1            | At5g45710.1     |             |
|        |        | A4c                              | CCG030319.1                      | Potri.004G062300.1            |                 |             |
|        | A5     | A5a                              | CCG001724.1                      | Potri.017G059600.1            | At4g13980.1     |             |
|        |        | A5b                              | CCG019200.1                      | Potri.001G320900.1            |                 |             |
|        |        | A5c                              | CCG019201.1                      |                               |                 |             |
|        | A6     | A6a                              | CCG007863.1                      | Potri.010G082000.1            | At5g43840.1     |             |
|        |        | A6b                              | CCG000940.1                      | Potri.008G157600.1            | At3g22830.1     |             |
|        | A7     | A7a                              | CCG013195.1                      | Potri.005G214800.1            | At3g51910.1     |             |
|        |        | A7b                              | CCG017804.1                      | Potri.002G048200.1            | At3g63350.1     |             |
|        |        | A7c                              | CCG034159.1                      |                               |                 |             |
|        | A8     | A8a                              | CCG033049.1                      | Potri.008G136800.1            | At1g67970.1     |             |
|        |        | A8b                              |                                  | Potri.010G104300.1            |                 |             |
|        | A9     | A9                               | CCG013896.1                      | Potri.006G148200.1            | At5g54070.1     |             |
| Type B | B1     | B1                               | CCG009216.1                      | Potri.007G043800.1            | At4g36990.1     |             |
|        |        | B2                               | CCG001341.1                      | Potri.012G138900.1            | At5g62020.1     |             |
|        | B2     | B2a                              | CCG024466.1                      | Potri.001G108100.1            | At4g11660.1     |             |
|        |        | B2b                              | CCG005948.1                      | Potri.015G141100.1            |                 |             |
|        |        | B2c                              | CCG007214.1                      |                               |                 |             |
|        |        | B2d                              |                                  |                               |                 |             |
|        | B3     | B3a                              | CCG001458.1                      | Potri.006G049200.1            | At2g41690.1     |             |
|        |        | B3b                              |                                  | Potri.016G056500.1            |                 |             |
|        | B4     | B4a                              | CCG027759.1                      | Potri.002G124800.1            | At1g46264.1     |             |
|        |        | B4b                              | CCG020996.1                      | Potri.009G068000.1            |                 |             |
|        |        | B4c                              | CCG010253.1                      | Potri.014G027100.1            |                 |             |
|        |        | B4d                              | CCG023235.1                      | Potri.001G273700.1            |                 |             |
|        | B5     | B5a                              | CCG006244.1                      | Potri.004G042600.1            |                 |             |
|        |        | B5b                              | CCG032077.1                      | Potri.011G051600.1            |                 |             |
|        | Type C | C1                               | C1                               | CCG004861.1                   | Potri.T137400.1 | At3g24520.1 |

**Table S2. Motif sequences identified by MEME tools in PeuHsfs.**

| <b>Motif</b> | <b>Length</b> | <b>Best possible match</b>                         |
|--------------|---------------|----------------------------------------------------|
| 1            | 50            | RYFKHNNFSSFVRQLNTYGFRKIDPDRWEFANECFRRGQKHLNCNIHRRK |
| 2            | 41            | FLTPTYDMVDDPSTDHIVSWNRDGNFSFVWDPPEFARDLLP          |
| 3            | 50            | VLMELVRLRQQQQSTDHQIQAMEQRLQWMECRQQQMMSFLAKAMQNPGF  |
| 4            | 29            | TQQQAVGACVEVGRFGYEEEEIERLKRDKN                     |
| 5            | 41            | ALIEENERLRKENCMLMSELTHMKKLCNDIIFVQNYVKPR           |
| 6            | 32            | VNDVFWEQFLTESPGYGDIEEVSSCYKANGYD                   |
| 7            | 49            | MKKELEEAMTKRRVPIDQKRGREGGGEMNHGEGHANPIKAEPREYGCY   |
| 8            | 50            | IMPHVSQMPPEMVPENVADIPCEDYMEPETCNDGFIDPASLNGTIPIDI  |
| 9            | 50            | AYSKKRRLPQVDHPMPIAENSLVENHCSSRPESNVIHQDFDKLRLELSP  |
| 10           | 46            | KKRRLKQEDVPENEGSGSHDQIVKYQPLMNEAAKAMLRQIMKMDA      |
| 11           | 21            | GWWKAQHVDNLTEQMGHLTPD                              |
| 12           | 29            | TQELNDTGGSYQFKINPGVPKDIPTRTSG                      |
| 13           | 50            | SNEEVDGHISCQLNLSLASSPLQVNKNPYLTRIPQLGQEIGKSPESRFNE |
| 14           | 15            | PPQPMGLHDTGPPP                                     |
| 15           | 21            | MQACTDHATCGGGGGQAAPWP                              |

Numbers in the first column indicate the motifs represented in the [Fig. 2b](#).



**Table S3. Paralogous pairs in four species *Hsf* families.**

|                       | No. | Subfamily | Gene 1            | Gene 2            | Duplication | Ka    | Ks    | Ka/Ks |
|-----------------------|-----|-----------|-------------------|-------------------|-------------|-------|-------|-------|
| <i>P. euphratica</i>  | 1   | A1        | <i>PeuHsf-A1c</i> | <i>PeuHsf-A1d</i> | W           | 0.173 | 0.343 | 0.503 |
|                       | 2   | A1        | <i>PeuHsf-A1a</i> | <i>PeuHsf-A1d</i> | W           | 0.004 | 0.009 | 0.389 |
|                       | 3   | A4        | <i>PeuHsf-A4a</i> | <i>PeuHsf-A4c</i> | W           | 0.069 | 0.253 | 0.274 |
|                       | 4   | A5        | <i>PeuHsf-A5b</i> | <i>PeuHsf-A5c</i> | T           | 0.003 | 0.009 | 0.303 |
|                       | 5   | A6        | <i>PeuHsf-A6a</i> | <i>PeuHsf-A6b</i> | W           | 0.116 | 0.204 | 0.568 |
|                       | 6   | A7        | <i>PeuHsf-A7a</i> | <i>PeuHsf-A7b</i> | W           | 0.077 | 0.279 | 0.275 |
|                       | 7   | B2        | <i>PeuHsf-B2c</i> | <i>PeuHsf-B2d</i> | W           | 0.141 | 0.362 | 0.388 |
|                       | 8   | B4        | <i>PeuHsf-B4a</i> | <i>PeuHsf-B4c</i> | W           | 0.022 | 0.325 | 0.068 |
|                       | 9   | B4        | <i>PeuHsf-B4b</i> | <i>PeuHsf-B4d</i> | W           | 0.061 | 0.316 | 0.194 |
|                       | 10  | B5        | <i>PeuHsf-B5a</i> | <i>PeuHsf-B5b</i> | W           | 0.096 | 0.335 | 0.286 |
| <i>P. trichocarpa</i> | 1   | A1        | <i>PtHsf-A1c</i>  | <i>PtHsf-A1a</i>  | W           | 0.098 | 0.277 | 0.354 |
|                       | 2   | A4        | <i>PtHsf-A4c</i>  | <i>PtHsf-A4a</i>  | W           | 0.063 | 0.236 | 0.268 |
|                       | 3   | A5        | <i>PtHsf-A5a</i>  | <i>PtHsf-A5b</i>  | O           | 0.063 | 0.235 | 0.269 |
|                       | 4   | A6        | <i>PtHsf-A6a</i>  | <i>PtHsf-A6b</i>  | W           | 0.077 | 0.143 | 0.535 |
|                       | 5   | A7        | <i>PtHsf-A7a</i>  | <i>PtHsf-A7b</i>  | W           | 0.065 | 0.249 | 0.261 |
|                       | 6   | A8        | <i>PtHsf-A8a</i>  | <i>PtHsf-A8b</i>  | W           | 0.087 | 0.334 | 0.260 |
|                       | 7   | B2        | <i>PtHsf-B2a</i>  | <i>PtHsf-B2c</i>  | W           | 0.135 | 0.355 | 0.382 |
|                       | 8   | B3        | <i>PtHsf-B3a</i>  | <i>PtHsf-B3b</i>  | W           | 0.037 | 0.235 | 0.158 |
|                       | 9   | B4        | <i>PtHsf-B4b</i>  | <i>PtHsf-B4d</i>  | W           | 0.055 | 0.314 | 0.176 |
|                       | 10  | B4        | <i>PtHsf-B4a</i>  | <i>PtHsf-B4c</i>  | W           | 0.022 | 0.321 | 0.068 |
| <i>S. suchowensis</i> | 1   | A4        | <i>SsuHsf-A4a</i> | <i>SsuHsf-A4c</i> | W           | 0.088 | 0.309 | 0.284 |
|                       | 2   | A6        | <i>SsuHsf-A6a</i> | <i>SsuHsf-A6b</i> | W           | 0.118 | 0.296 | 0.400 |
|                       | 3   | A7        | <i>SsuHsf-A7a</i> | <i>SsuHsf-A7b</i> | W           | 0.119 | 0.348 | 0.343 |
|                       | 4   | A8        | <i>SsuHsf-A8a</i> | <i>SsuHsf-A8b</i> | W           | 0.100 | 0.320 | 0.312 |
|                       | 5   | B4        | <i>SsuHsf-B4b</i> | <i>SsuHsf-B4d</i> | W           | 0.117 | 0.379 | 0.308 |
| <i>A. thaliana</i>    | 1   | A1        | <i>AtHsf-A1a</i>  | <i>AtHsf-A1c</i>  | W           | 0.414 | 1.269 | 0.326 |
|                       | 2   | A1        | <i>AtHsf-A1d</i>  | <i>AtHsf-A1b</i>  | W           | 0.209 | 0.779 | 0.268 |
|                       | 3   | A4        | <i>AtHsf-A4a</i>  | <i>AtHsf-A4b</i>  | W           | 0.173 | 0.817 | 0.212 |
|                       | 4   | A6        | <i>AtHsf-A6a</i>  | <i>AtHsf-A6b</i>  | W           | 0.423 | 2.011 | 0.210 |

**Table S4. List of primers used for qRT-PCR analysis.**

|                     | <b>Forward primer</b>      | <b>Reverse primer</b>       |
|---------------------|----------------------------|-----------------------------|
| <i>PeuHsf-A1a/d</i> | CAGCTTCTCATTTTCCGGATATG    | GAAGCTGGATCTATGAATCCATCAT   |
| <i>PeuHsf-A1b</i>   | GGTTTCAGGAAGGTTGATCCTG     | GTCTAACAAGTTCCTGCATGAGAAC   |
| <i>PeuHsf-A1c</i>   | GCCGCCATTTCTGAGTAAGACT     | TAGCATGTCCATGGGCAGG         |
| <i>PeuHsf-A2</i>    | CCATCAAACGGAAAAGACATCTC    | TTTCTCTCTGTGCTCCGTAACCTA    |
| <i>PeuHsf-A3</i>    | GTTGAAGAACATTCATAGGCGC     | GCTGCCTGAAGTCTCTGATTTACT    |
| <i>PeuHsf-A4a</i>   | AGTTACAGCAAACGGAATGCAT     | CATGGGAAGTCACCATTG          |
| <i>PeuHsf-A4b</i>   | ACCACATTCGAGGGACATTTG      | CATTTGCTCCGTTACCACA         |
| <i>PeuHsf-A4c</i>   | GCTGAAGCAAATGGAACGAAG      | CAGAGCTTGGGAAGTAACCGTC      |
| <i>PeuHsf-A5a</i>   | GCATCTGCTTAAGAACATCCACA    | GCTGTGAAAGCCCTAGAATACTTC    |
| <i>PeuHsf-A5b/c</i> | CCACAGTCATAGTCAACCTCAAGGT  | CCTCTGCTGCATAGTATCTATCTTCTG |
| <i>PeuHsf-A6a</i>   | TAAGCCGAGACAAAACGAGCAT     | TCCTCTTCAAGCTCTTTTCATCATG   |
| <i>PeuHsf-A6b</i>   | ACCAACTGATCAACTTGGTGGAG    | AACACTCAACACATCTTCCTCATCTT  |
| <i>PeuHsf-A7a</i>   | CCTTTTTACAGCAGTTAGTTCAGCA  | CCAGCTCTGAGACTTCAATTTCAAG   |
| <i>PeuHsf-A7b/c</i> | GCAAAGGCTACAATGGACAGAA     | ACCACCACTTCGACCAGGTCT       |
| <i>PeuHsf-A8</i>    | ACAGCTTTGTTATATGGGACATGAC  | GCTCAATGGAGTTGTCTTGCTG      |
| <i>PeuHsf-A9</i>    | CAGCAGAGCGGAGCAGTTACT      | GCAATTGTTTGCACTCTGCAG       |
| <i>PeuHsf-B1</i>    | GATCCAAGCACTGATGATGTGAT    | GGAGCTCTTTGTGTCCCTCGC       |
| <i>PeuHsf-B2a/d</i> | CGATCATACGATAGACGATGTGC    | GATTTTCCTCCTTTGTATATTGGCT   |
| <i>PeuHsf-B2b</i>   | CATGGAACGACGATGGATCA       | AATATCGCGGAGAAGTGCTTT       |
| <i>PeuHsf-B2c</i>   | GGGAAACTCCAACATCCTCACTA    | GGAGAAAAGGGTTGGATTCCAG      |
| <i>PeuHsf-B3</i>    | ATTTGTGGTGTGGCAACCG        | GCAATAGGTTGTTGCTTGCTAGAC    |
| <i>PeuHsf-B4a</i>   | CTAATGGTTCTCTAGTACAGAAGCCC | CAATCTTTTCTTTGTTTGTAAATGGC  |
| <i>PeuHsf-B4b</i>   | TGTCAGGCAGCTCAACACCTAC     | CGCAGTTAGGATATGATCAACACA    |
| <i>PeuHsf-B4c</i>   | AGCACCATATGCTACTGCTAATCC   | GCTCTGCGAAGTAGTTGTTGGA      |
| <i>PeuHsf-B4d</i>   | TTCAATCTCCAAAACCAAGTACTGA  | GCTTAGGTGCTGCATTATAAGCC     |
| <i>PeuHsf-B5a</i>   | TTCAAGCATGAGAAGTTCTTGAGAG  | TCTCCTCCATGAGTATCAAACGAT    |
| <i>PeuHsf-B5b</i>   | CATGATAGCGCTCCTCATGGT      | CCTCCTCCCTTTCTGAAACATT      |
| <i>PeuHsf-C1</i>    | TCTCTCAGAGGATTTTGCCTGTT    | ATGCTTCCTGCGAACTATATTCTTC   |
